# Supplementary material
Source: publisher site journal article supplement (http://static.cambridge.org/content/id/urn:cambridge.org:id:article:S0047279419000230/resource/name/S0047279419000230supp001.docx)
Supplement: Supplementary file 1 [file S0047279419000230supp001.docx]

**Appendixes**

Appendix 1. Fathers’ and mothers’ respective share of annual net days of parental leave in Sweden (in per cent), 1974-2010

*Source:* Försäkringskassan (2012, 2016)

Appendix 2. Fathers’ educational composition by calendar years, Sweden 1993-2010

*Source:* Authors’ calculations based on Swedish register data

Appendix 3. Couples’ composition by country of origin and calendar years, Sweden 1993-2010

*Source:* Authors’ calculations based on Swedish register data
